# Supplementary material for: Oxygen stable isotopes during the Last Glacial Maximum climate: perspectives from data–model ( i LOVECLIM) comparison
Source: Copernicus journal article supplement (doi:10.5194/cp-10-1939-2014), 2014-11-10
Supplement: Supplementary file 1 [file Caley et al. Table_S2_Planktonic_LGM_CP(revised).xlsx]

## Sheet: synthesis
Core Name	Latitude	Longitude	Depth (m)	References	Doi	Foraminiferal species	Chronostratigraphic quality LGM ( MARGO definition)	Sample depth - upper (m)	Sample depth - lower (m)	δ18Oc LGM (19-23 kyr) (‰)	error (1σ)	no. data points in LGM average	Chronostratigraphic quality LH ( MARGO definition)	Sample depth - upper (m)	Sample depth - lower (m)	δ18Oc LH (‰)	error (1σ)	no. data points in LH average	δ18Oc LGM-LH (‰)	Error Anomaly (2σ)
SO136-111	-56.67	160.23	3912	Crosta et al., 2004	10.1016/S0377-8398(03)00072-0	pachyderma sinistral	3	0.72	0.77	4.4	0.01	2	2	0.02	0.07	3.13	0.1	4	1.273	0.200998
TTN057-13-PC4	-53.2	5.1	2800	Hodell et al., 2001	10.1006/qres.2001.2252	pachyderma sinistral	3	8.11	8.45	4.81	0.09	5	1	0.04	1.07	3.52	0.11	11	1.29	0.284253
MD07-3128	-52.6595	-75.5662	1032	Caniupan et al., 2011	10.1594/PANGAEA.771860	pachyderma sinistral	1	2.89	7.29	2.044	0.23	37	2	0.01	0.01	1.068	0.49	1	0.976	1.08259
RC13-271	-51.99	4.522	3634	Charles et al., 1991	10.1594/PANGAEA.727615	pachyderma sinistral and dextral	3	9	10.3	3.74	0.61	6	4	0.08	1.5	2.76	0.2	14	0.98	1.2839
RS147-GC07	-45.15	146.28	3300	Sikes et al., 2009	10.1594/PANGAEA.831970	Bulloides	1	0.855	0.99	3.22	0.08	10	1	0.005	0.115	0.95	0.12	6	2.27	0.288444
181-1119	-44.7555	172.393	396.2	Carter et al., 2004	10.1594/PANGAEA.772064	Bulloides	2	8.04	12.74	3	0.25	10	3	0.05	0.05	1.4	0.03	1	1.6	0.503587
RC11-120	-43.5167	79.8667	3193	Rickaby and Elderfield, 1999	10.1029/1999PA900007	Bulloides	3	0.75	0.9	3.36	0.05	4	4	0.05	0.1	1.92	0.04	2	1.44	0.128062
MD84-527	-43.49	51.19	3262	Pichon et al., 1992	10.1594/PANGAEA.727840	pachyderma sinistral	3	3.1	3.29	4.45	0.3	2	1	0	0.4	2.09	0.17	5	2.36	0.68
TN057-6	-42.9014	8.9	3751	Hodell et al., 2003	10.1016/S0921-8181(99)00069-7	Bulloides	3	0.69	0.81	3.028	0.28	5	4	0.03	0.09	1.555	0.17	3	1.473	0.655134
P69	-40.4	178	2197	Nelson et al., 2000	10.1594/PANGAEA.729180	Bulloides	3	4.2	5.61	1.7	0.37	10	4	0	0.45	0.5	0.25	4	1.2	0.893085
MD03-2611	-36.73	136.55	2420	Calvo et al., 2007	10.1029/2007GL029937	Bulloides	2			2.51	0.07	4	2			0.41	0.086	8	2.1	0.221775
ABS	-36.32	19.47	2488	Martinez-Mendez et al., 2010	10.1029/2009PA001879	Bulloides	1	2.967	3.175	1.25	0.11	10	2	0.155	0.505	0.13	0.32	5	1.12	0.676757
MD96-2077	-33.17	31.25	3781	Bard and Rickaby, 2009	10.1038/nature08189	Inflata	3	1.0105	1.405	1.51	0.11	4	4	0.005	0.105	0.43	0.03	2	1.08	0.228035
KNR159–5–36GGC	-27.52	-46.47	1268	Carlson et al., 2008	10.1130/G25080A.1	G.ruber	1	1.52	2.08	0.499583	0.127	12	1	0.01	0.16	-0.9515	0.074	5	1.45108	0.293973
MD96-2048	-26.167	34.02	660	Caley et al., 2011	10.5194/cp-7-1285-2011	G.ruber	3	0.68	0.88	-0.42	0.12	8	4	0	0.08	-1.51	0.04	3	1.09	0.252982
GeoB10285	-20.1033	9.185	2209	Schneider et al., 1995	10.1029/94PA03308	G.ruber	3	0.93	0.103	1.1	0.18	3	4	0.01	0.18	-0.63	0.05	2	1.73	0.373631
MD01-2378	-13.0825	121.788	1783	Holbourn et al., 2005	10.1594/PANGAEA.738105	G.ruber	1	3.62	4.22	-1.10429	0.055	7	1	0.06	0.46	-2.688	0.08	5	1.58371	0.194165
GeoB10163	-11.7672	11.6817	3411	Schneider et al., 1995	10.1029/94PA03308	G.ruber	3	1.18	1.48	-0.286	0.1	7	4	0.04	0.1	-1.78	0.02	3	1.494	0.203961
GeoB10083	-6.58167	10.3183	3124	Schneider et al., 1995	10.1029/94PA03308	G.ruber	3	2.23	2.58	-0.225	0.1	8	4	0.03	0.18	-1.5225	0.1	4	1.2975	0.282843
GeoB 10038-4	-5.94	103.25	1819	Mohtadi et al., 2010	10.1594/PANGAEA.736652	G.ruber	2	1.78	2.03	-0.752581	0.22	6	1	0	0.28	-2.74	0.21	7	1.98742	0.608276
V21-40	-5.52	-106.767	3182	Koutavas and Lynch-Stieglitz, 2003	10.1029/2003PA000894	G.ruber	2	0.82	0.94	-0.48	0.12	4	2	0	0.05	-1.48	0.05	2	1	0.26
GeoB3129/3911	-4.61	-36.64	830	Weldeab et al., 2006	10.1016/j.epsl.2005.11.012	G.ruber	2	6.63	6.83	-0.26	0.1	9	1	0.02	0.38	-1.79	0.05	9	1.53	0.223607
GeoB3104-1	-3.66667	-37.7167	767	Arz et al., 1998	10.1594/PANGAEA.711735	G.ruber pink	2	1.705	2.005	-0.31	0.14	13	2	0.03	0.08	-1.52333	0.1	3	1.21333	0.344093
V19-28	-2.367	-84.65	2720	Koutavas and Lynch-Stieglitz, 2003	10.1029/2003PA000894	G.ruber	2	1.52	1.595	-0.19	0.19	3	1	0.06	0.12	-1.63	0.36	2	1.44	0.814125
RC11-238	-1.52	-85.82	2573	Koutavas and Lynch-Stieglitz, 2003	10.1029/2003PA000894	G.ruber	2	0.98	1.2	-0.3	0.167	5	2	0	0	-1.32	0	1	1.02	0.17
10029-4	-1.495	100.128	964	Mohtadi et al., 2010	10.1594/PANGAEA.736652	G.ruber	2	1.38	1.88	-1.36	0.1	11	1	0	0.18	-2.95	0.15	5	1.59	0.360555
V21-30	-1.22	-89.68	617	Koutavas and Lynch-Stieglitz, 2003	10.1029/2003PA000894	Sacculifer	2	2.5	2.8	-0.32	0.09	6	1	0	0.15	-1.55	0.1	3	1.23	0.269072
V21-29	-1.05	-89.35	712	Koutavas and Lynch-Stieglitz, 2003	10.1029/2003PA000894	Sacculifer	2	1.94	2.8	-0.4	0.13	12	1	0	0.085	-1.56	0.05	3	1.16	0.278568
V19-27	-0.467	-82.067	1373	Koutavas and Lynch-Stieglitz, 2003	10.1029/2003PA000894	G.ruber	2	1.06	1.2	-0.67	0.226	4	1	0	0.21	-2.14	0.3	4	1.47	0.751202
MW91-15	-0.02306	158.941	2311	Patrick et al., 1997	10.1029/97PA01553	G.ruber	3	0.42	0.46	-1.26	0.13	3	3	0.06	0.06	-2.33	0.01	1	1.07	0.260768
TR163-22	0.005	-92.4	2830	Lea et al., 2006	10.1016/j.quascirev.2005.11.010	G.ruber	2	1.58	2	-0.114545	0.18	22	1	0.02	0.16	-1.45333	0.12	6	1.33879	0.432666
ODP806B	0.31778	159.357	2520	Lea et al., 2000	10.1126/science.289.5485.1719	G.ruber	3	0.58	0.7	-1.302	0.09	5	4	0.03	0.03	-2.3	0	1	0.998	0.18
TR163-19	2.25	-90.95	2348	Spero et al., 2003	10.1029/2002PA000814	G.ruber	3	0.74	0.89	-0.66	0.16	4	4	0.01	0.09	-2.2	0.1	3	1.54	0.377359
MD03-2707	2.50194	9.39472	1295	Weldeab et al., 2007	10.1126/science.1140461	G.ruber	1	7.755	9.355	-0.336875	0.14	33	1	0.145	1.705	-2.28848	0.12	79	1.95161	0.368782
RC13-140	2.867	-87.75	2246	Koutavas and Lynch-Stieglitz, 2003	10.1029/2003PA000894	G.ruber	2	1	1.25	-0.96	0.055	6	1	0.05	0.1	-2.66	0.05	2	1.7	0.148661
MD98-2181	6.3	125.83	2114	Stott et al., 2002	10.1126/science.1071627	G.ruber	1	12.86	14.61	-0.947	0.14	8	3	0.01	0.365	-2.78	0.22	119	1.833	0.521536
MD06-3067	6.51433	126.498	1575	Bolliet et al., 2011	10.1594/PANGAEA.770288	G.ruber	1	2.79	3.24	-1.13	0.13	25	2	0.11	0.11	-2.41	0.11	1	1.28	0.340588
ODP1242	7.85583	-83.6069	1364	Benway et al., 2006	10.1029/2005PA001208	G.ruber	2	2.78	3.41	-0.814706	0.207303	17	3	0.01	0.21	-2.6	0.170294	5	1.79	0.536562
ME005A-43JC	7.85583	-83.6083	1368	Benway et al., 2006	10.1029/2005PA001208	G.ruber	1	1.71	2.23	-0.795238	0.221738	21	2	0.01	0.15	-2.55	0.111887	5	1.75	0.496736
MD02-2529	8.21	-84.122	1619	Leduc et al., 2007	10.1038/nature05578	G.ruber	1	5.15	5.75	-1.041	0.345	20	1	0.03	0.12	-3	0.25	13	1.959	0.852115
ODP769A	8.78556	121.294	3656	Linsley, 1996	10.1038/380234a0	G.ruber	2	2.06	2.55	-1.52	0.14	21	2	0.2	0.35	-2.6	0.06	4	1.08	0.304631
odp124-769A	8.7856	121.294	3656	Linsley et al., 1994	10.1594/PANGAEA.729853	G.ruber	2	2.5	2.75	-1.79	0.13	6	4	0.25	0.3	-2.61	0.06	2	0.82	0.286356
MD97-2141	8.8	121.3	3633	Rosenthal et al., 2003	10.1029/2002GL016612	G.ruber	1	3.2	4	-1.6	0.11	80	2	0	0	-2.53	0	1	0.93	0.22
PL07-39 and 43PC	10.7	-65.9417	790	Lin et al., 1997	10.1029/97PA00230	G.ruber	1	9.5	9.9	0.782	0.0812058	9	1	0	0.95	-1.26	0.152101	20	2.042	0.344843
VM12-107	11.33	-66.63	1079	Schmidt et al., 2012	10.1073/pnas.1207806109	G.ruber	2	2.305	2.605	0.6	0.147919	10	1	0.005	0.095	-2.035	0.065	2	2.64	0.323141
VM28-122	11.5667	-78.4167	3623	Schmidt et al., 2004	10.1038/nature02346	G.ruber	2	1.26	1.38	-0.131429	0.0788178	7	2	0.04	0.04	-1.97	0.0374166	1	1.83857	0.174496
M35003-4	12.0833	-61.25	1299	Ruehlemann et al., 1999	10.1038/990069	G.ruber pink	2	3.18	3.68	-0.45	0.1	11	1	0.03	0.53	-2.14	0.13	11	1.69	0.328024
ODP999A	12.75	-78.7333	2827	Schmidt et al., 2004	10.1038/nature02346	G.ruber	2	0.81	1.01	-0.0783333	0.130996	5	2	0.01	0.01	-1.86	0.005	1	1.78167	0.262183
74KL	14.3211	57.3469	3212	Sirocko et al., 1993	10.1038/364322a0	G.ruber	1	1.575	1.925	-0.17	0.14	15	1	0.025	0.275	-1.74	0.087	11	1.57	0.32966
SCS90-36	17.995	111.494	2050	Huang et al., 1997	doi:10.1594/PANGAEA.738493	Sacculifer	2	0.93	0.96	-1.03	0.14	2	1	0	0.09	-2.5	0.21	4	1.47	0.504777
BOFS31/1K	18.9979	-20.1621	3300	Elderfield et al., 2000	10.1594/PANGAEA.143845	G.ruber	3	0.58	0.78	0.885	0.13	6	4	0	0	-0.9	0.05	1	1.785	0.278568
17940-1/2	20.12	117.38	1727	Wang et al., 1999	10.1029/1999PA900028	G.ruber	2	8.745	9.325	-1.24565	0.134844	30	1	0.005	1.645	-2.5982	0.142	148	1.35255	0.391647
MD04-2861	24.13	63.91	2049	Caley (unpublished)		G.ruber	1	4.3	4.9	0.097	0.07	4	1	0.1	0.5	-1.881	0.154	3	1.978	0.338325
MD02-2575	29	-87.12	847	Nuernberg et al., 2008	10.1016/j.epsl.2008.04.051	G.ruber	2	3.3	4.4	0.084	0.395697	22	1	0.05	0.55	-1.07	0.181007	11	1.15	0.870263
AHF16832	31.6667	-118.183	1915	Stott et al., 2000	10.1029/1999PA000375	Bulloides	3	2	2.39	1.18	0.98	5	4	0.04	0.1	-1.205	0.275	2	2.385	2.03571
EW9504-03	32.0667	-117.367	1299	Stott et al., 2000	10.1029/1999PA000375	Bulloides	2	0.96	1.08	2.21	0.19	3	4	0.18	0.18	0.48	0	1	1.73	0.38
EW9504-04	32.2833	-118.4	1759	Stott et al., 2000	10.1029/1999PA000375	Bulloides	2	1.61	1.91	1.522	0.24	5	3	0.02	0.16	0.353	0.22	3	1.169	0.651153
EW9504-05	32.4833	-118.133	1818	Stott et al., 2000	10.1029/1999PA000375	Bulloides	2	1.26	1.5	2.515	0.26	2	4	0.08	0.08	0.46	0.25	1	2.055	0.721388
KNR140-51GGC	32.78	-76.28	1790	Carlson et al., 2008	10.1130/G25080A.1	G.ruber	2	3.76	3.9	0.178563	0.17	3	3	0.1	0.8	-1.71433	0.09	8	1.8929	0.384708
EW9504-08	32.8	-118.8	1442	Stott et al., 2000	10.1029/1999PA000375	Bulloides	2	1.45	1.75	1.9	0.136	4	3	0.02	0.22	1.19	0.28	4	0.71	0.622562
AHF-11343	32.8	-119.857	1171	Mortyn et al., 1996	10.1594/PANGAEA.729958	Bulloides	2	3.25	3.975	1.94	0.13	9	3	0.46	0.545	0.5	0.17	2	1.44	0.428019
167-1014	32.8339	-119.981	1166	Hendy et al., 2000	10.1594/PANGAEA.742765	Bulloides	3	2.35	2.85	2.23727	0.11	11	4	0	0.45	0.26	0.385	10	1.97727	0.800812
EW9504-09	32.8667	-119.967	1194	Stott et al., 2000	10.1029/1999PA000375	Bulloides	2	2.08	2.48	1.51	0.2	6	1	0.02	0.24	0.2475	0.44	4	1.2625	0.966644
MD02-2503	34.28	-120.04	570	Hill et al., 2006	10.1029/2005PA001186	Bulloides	3	27.775	32.795	2.49	0.54	21	4	0.205	4.195	-0.21	0.22	14	2.7	1.16619
LC21	35.67	26.58	1522	Grant et al., 2012	10.1038/nature11593	G.ruber	1			2.775	0.1	15	1			0.408	0.24	28	2.367	0.52
MD01-2421	36.02	141.78	2224	Oba and Murayama, 2004	10.1002/jqs.843	Bulloides	2	9.69	10.63	2.6	0.45	12	1	0.01	2.85	0	0.27	15	2.6	1.04957
M25/4-KL11	36.7458	17.7175	3376	Allen et al., 1999	10.1594/PANGAEA.707088	G.ruber	1	0.808	1.077	3.02	0.26	19	1	0.006	0.042	0.1	0.21	4	2.92	0.668431
SU81-18	37.767	-10.18	3135	Gherardi et al., 2005	10.1016/j.epsl.2005.09.061	Bulloides	1	3.85	4.2	2.03	0.15	6	1	0.08	0.45	0.0075	0.05	4	2.0225	0.316228
KH94-3,LM-8	38.88	143.367	2353	Oba and Murayama, 2004	10.1002/jqs.843	Bulloides	2	2.038	2.403	3.08	0.27	12	1	0	0.377	0.73	0.56	10	2.35	1.24338
MD99-2343	40.4973	4.02817	2391	Frigola et al., 2008	10.1594/PANGAEA.759537	Bulloides	2	6.5	8.04	3.82933	0.15	30	1	0.2	1	1.42882	0.15	17	2.40051	0.424264
MD95-2040	40.5818	-9.86117	2465	de Abreu et al., 2003	10.1594/PANGAEA.733309	Bulloides	1	3.38	4.64	2.50114	0.12	43	1	0.02	0.35	0.31	0.15	12	2.19114	0.384187
KT90-9, 5	41.12	143.52	2098	Oba and Murayama, 2004	10.1002/jqs.843	Bulloides	2	3.5	4.3	3.27	0.33	8	4	0.8	0.9	1.92	0.1	2	1.35	0.689638
SU92-03	43.1958	-10.113	3005	Salgueiro et al., 2010	10.1594/PANGAEA.743085	Bulloides	2	1.025	1.375	3.08	0.12	8	2	0.025	0.085	0.95	0.26	3	2.13	0.572713
ODP851	46.2172	-34.3008	3760	Cannariato et al., 1997	10.1029/97PA02514	Sacculifer	3	0.61	0.8	-0.416667	0.28	2	4	0.03	0.06	-1.15	0.15	2	0.733333	0.635295
GIK23519-5	64.7973	-29.5958	1893	Millo et al., 2006	10.1594/PANGAEA.271549	pachyderma sinistral	2	0.73	1.03	4.45	0.12	7	3	0.03	0.03	2.65	0.04	1	1.8	0.252982
OCE326-GGC5	33.7	-57.58	4550	Carlson et al., 2008	10.1130/G25080A.1	Inflata	1	3.37	4.05	1.79	0.13	6	3	0.06	0.22	0.81	0.1	2	1	0.340588
BAR-9442	-6.08	102.42	2542	LSCE unpublished data		G.ruber	3	1.47	1.54	-0.39	0.17	2	3	0.07	0.79	-2.78	0.14	10	2.39	0.440454
CH69-K09	41.76	-47.35	4100	Labeyrie et al., 1999; Waelbroeck et al., 2001	10.1038/35089060	Bulloides	2	3.13	3.4	2.7	0.32	11	1	0	0.31	1.155	0.31	9	1.545	0.891067
CH73-139C	54.64	-16.36	2209	Duplessy et al., 1986	10.1038/320350a0	Bulloides	2	1.8	2	3.31	0.08	3	1	0	0.35	0.91	0.04	6	2.4	0.178885
CH77-03	57.93	-29.1	2271	LSCE unpublished data		pachyderma sinistral	3	1.35	1.425	4.49	0.15	4	4	0	0.2	1.74	0.11	6	2.75	0.372022
CHO288-54	17.43	-77.66	1020	LSCE unpublished data		G.ruber	1	1.1	1.1	-0.05	0.02	3	1	0	0.25	-2.13	0.09	13	2.08	0.184391
CS72-37	36.69	12.28	1304	LSCE unpublished data		Bulloides	3	1.94	2.8	3.48	0.2	9	4	0	0.35	1.07	0.18	5	2.41	0.538145
ENAM93-21	62.7	-4	1020	Rasmussen et al., 1996; Rasmussen et al., 1998	10.1144/GSL.SP.1998.129.01.16	pachyderma sinistral	2	2.35	2.75	4.63	0.13	16	5	0	0.13	2.673	0.14	3	1.957	0.382099
KET80-04	39.67	13.57	2909	Paterne et al., 1988	10.1016/0377-0273(88)90030-3	Bulloides	2	2.07	2.4	3.47	0.16	4	3	0	0.25	1.39	0.06	3	2.08	0.34176
KET80-11	39.16	15.08	2111	Paterne et al., 1988	10.1016/0377-0273(88)90030-3	Bulloides	2	1.54	1.85	3.78	0.14	3	3	0	0.4	1.87	0.23	4	1.91	0.538516
KET80-22	40.58	11.71	2430	Paterne et al., 1988	10.1016/0377-0273(88)90030-3	Bulloides	3	1.58	1.88	3.79	0.08	3	4	0	0.3	1.45	0.35	2	2.34	0.718053
KET82-16	41.52	17.98	1166	LSCE unpublished data		Bulloides	2	1.9	2.5	3.88	0.18	6	1	0	0.23	1.43	0.28	3	2.45	0.665733
MD00-2374	-46.03	96.48	3250	LSCE unpublished data		pachyderma sinistral	3	1.4	2.5	3.92	0.1	13	4	0	0.12	1.99	0.09	4	1.93	0.269072
MD02-2488	-46.48	88.02	3420	LSCE unpublished data		pachyderma sinistral	3	4.3	5.65	3.62	0.16	28	3	0	0.7	1.89	0.28	21	1.73	0.644981
MD76-125	8.58	75.33	1878	Duplessy, 1982; Fontugne and Duplessy, 1986	10.1038/295494a0	G.ruber	3	1.2	1.5	-0.78	0.12	4	1to3	0.006	0.007	-2.63			1.85
MD76-135	14.44	50.52	1895	Duplessy, 1982	10.1038/295494a0	G.ruber	3	2	2.5	-0.2	0.09	6	1to3	0.004	0.005	-1.89			1.69
MD77-169	10.21	95.05	2360	Duplessy, 1982	10.1038/295494a0	G.ruber	1	1.6	1.94	-1.13	0.05	4	2	0	0.16	-3.28	0.13	2	2.15	0.278568
MD77-171	11.76	94.15	1760	Duplessy et al., 1981	10.1016/0031-0182(81)90031-6	G.ruber	3	2.8	3.2	-1.2	0.16	9	4	0	0.3	-3.1	0.15	4	1.9	0.438634
MD77-176	14.52	93.13	1375	Duplessy, 1982	10.1038/295494a0	G.ruber	1	6.12	6.84	-1.37	0.38	33	2	0	1.5	-3.22	0.18	52	1.85	0.84
MD77-194	10.47	75.23	1222	Duplessy et al., 1981	10.1016/0031-0182(81)90031-6	G.ruber	3	3.3	4.4	-0.74	0.18	23	4	0	0.52	-2.62	0.15	10	1.88	0.468615
MD79-254	-17.88	38.67	1934	Van Campo et al., 1990	10.1038/348209a0	G.ruber	2	1.58	2.73	-0.68	0.28	25	4	0	0.25	-1.98	0.21	6	1.3	0.7
MD79-256	-19.57	37.03	1222	LSCE unpublished data		G.ruber	2	3.3	4.6	-0.49	0.07	6	4	0	0.6	-2.15		5	1.66	0.14
MD79-257	-20.4	36.33	1262	Duplessy et al., 1991	10.1016/0012-821X(91)90147-A	G.ruber	1	6.1	6.6	-0.64	0.12	6	1	0	0.47	-1.91	0.08	4	1.27	0.288444
MD80-304	-51.07	67.73	1930	Duplessy et al., 1991	10.1016/0012-821X(91)90147-A	pachyderma sinistral	3	2.3	2.51	4.91	0.16	8	3	0	0.01	2.94		1	1.97	0.32
MD88-770	-46.02	96.45	3290	Duplessy et al., 1991	10.1016/0012-821X(91)90147-A	pachyderma sinistral	2	1.03	1.76	4.1	0.09	7	3			1.98	0.09		2.12	0.254558
MD90-905	37.74	-10.17	2925	LSCE unpublished data		Bulloides	2	3.1	3.8	1.78	0.18	8	3	0	0.5	-0.216	0.21	5	1.996	0.553173
MD90-917	41.28	17.62	1010	Siani et al., 2001	10.1126/science.1063649	G.ruber	3	4.95	5.95	3.4	0.07	21	4	0	1	0.66	0.22	12	2.74	0.461736
MD95-2037	37.09	-32.03	2159	LSCE unpublished data		Bulloides	2	3.75	4.35	1.98	0.21	13	2	0	11	0.17	0.01	2	1.81	0.420476
MD98-2165	-9.65	118.34	2100	Levi et al., 2007	10.1029/2006GC001514	G.ruber	1	7.3	7.66	-0.95	0.09	20	2	0	2.65	-2.66	0.13	35	1.71	0.316228
MD98-2172	-8.52	128.15	1768	LSCE unpublished data		G.ruber	2	5.36	6.17	-1.17	0.12	25	5	0	0.01	-2.79		1	1.62
MD98-2192	26.65	125.82	1432	LSCE unpublished data		G.ruber	2	7.5	8	-1.06	0.27	6	1	0	1	-2.27	0.24	70	1.21	0.722496
MD99-2344	41.1	4.84	2326	LSCE unpublished data		Bulloides	2	2.31	2.9	3.85	0.08	7	2	0	0.21	1.12	0.07	13	2.73	0.18868
MD99-2346	42.04	4.15	2099	LSCE unpublished data		Bulloides	2	5.27	8.31	3.77	0.22	33	2	0	0.32	1.3	0.09	6	2.47	0.48
NA87-22	55.5	-14.7	2161	Duplessy et al., 1992; Waelbroeck et al., 2001	10.1038/35089060	Bulloides	1	3.63	4.5	3.7	0.27	27	1	0	0.75	1.13	0.155	23	2.57	0.622656
SHI90-14	-5.78	126.97	3163	LSCE unpublished data		G.ruber	2	0.54	0.72	-1.02	0.02	2	2	0	0.05	-2.56		1	1.54
SHI90-22	-11.58	122.05	2313	LSCE unpublished data		G.ruber	1	5.35	6.05	-1.07	0.11	7	2	0	0.94	-2.65	0.19	10	1.58	0.43909
SU81-14	36.77	-9.85	2795	LSCE unpublished data		Bulloides	1	2.58	4.2	2.29	0.22	17	2	0	0.22	0.08	0.19	3	2.21	0.58
SU90-08	43.05	-30.04	3080	Elliot et al., 1998; Labeyrie et al., 1995	10.1098/rstb.1995.0067	pachyderma sinistral	2	0.8	0.96	3.73	0.2	16	5	0	0.01	0.8	0.19	2	2.93	0.551725
SU92-28	37.1	-9.48	997	LSCE unpublished data		Bulloides	2	2.22	2.65	1.92	0.32	10	1	0.3	0.55	0.145	0.175	8	1.775	0.729452

## Sheet: SO136-111
Depth [m]	Age [kyr BP]	d18O_planktic
0.02	5.7	3.16
0.07	6.59308	3.05
0.12	7.5	3.17
0.17	8.4	3.12
0.22	9.3	3.3
0.27	10.2	3.23
0.32	11.05	3.6
0.37	12	3.62
0.42	12.85	3.79
0.47	13.7	3.81
0.52	14.65	4.03
0.57	15.5	4.2
0.62	16.4	4.36
0.67	17.35	4.52
0.72	19.8316	4.39
0.77	22.3532	4.42
0.82	24.8747	4.33
0.87	27.3963	4.3
0.92	29.9179	4.29

## Sheet: TTN057-13-PC4
Depth [m]	Age [kyr BP]	d18Opachy
0.04	0.16	3.55
0.07	0.265	3.5
0.13	0.475	3.37
0.19	0.685	3.53
0.22	0.771628	3.54
0.25	0.84907	3.68
0.46	1.39116	3.36
0.64	1.85642	3.52
0.7	2.01497	3.47
0.79	2.2528	3.76
1.07	2.99269	3.47
2.35	6.37508	3.7
2.41	6.53363	3.44
2.47	6.69218	3.51
2.5	6.77145	3.51
2.55	6.90358	3.48
2.59	6.97057	3.52
2.83	7.29513	3.56
2.86	7.3357	3.41
2.92	7.41684	3.52
2.95	7.45741	3.52
2.98	7.49798	3.62
3.01	7.53855	3.7
3.04	7.57912	3.55
3.07	7.61969	3.85
3.31	7.94425	3.52
3.34	7.98482	3.92
3.37	8.02539	3.79
3.4	8.06596	3.43
3.46	8.1471	3.48
3.49	8.18767	3.68
3.55	8.26881	3.42
3.58	8.30938	3.98
3.61	8.34995	3.96
3.64	8.39052	3.78
3.67	8.43109	3.58
3.76	8.5528	3.71
3.79	8.59337	3.62
3.82	8.63394	3.62
3.85	8.67451	3.64
3.88	8.71508	3.5
3.91	8.75565	3.55
3.94	8.79622	3.52
3.97	8.83679	3.56
4	8.87736	3.82
4.06	8.9585	3.78
4.09	8.99907	3.69
4.12	9.03964	3.69
4.15	9.08021	3.74
4.18	9.12078	3.71
4.21	9.16135	3.78
4.24	9.20192	3.63
4.27	9.24249	3.61
4.3	9.28306	3.76
4.33	9.32363	3.79
4.36	9.3642	3.67
4.39	9.40477	3.59
4.42	9.44534	3.63
4.45	9.48591	3.55
4.48	9.52648	3.78
4.51	9.545	3.56
4.54	9.5525	3.61
4.57	9.56	3.54
4.6	9.5675	3.61
4.63	9.575	3.61
4.69	9.59	3.51
4.72	9.5975	3.63
4.75	9.62029	3.73
4.78	9.65072	3.71
4.81	9.68116	3.72
4.84	9.71159	3.54
5.02	9.8942	3.75
5.05	9.92464	3.7
5.2	10.0768	3.54
5.23	10.1072	3.41
5.26	10.1377	3.5
5.29	10.1681	3.68
5.36	10.2391	3.7
5.39	10.2696	3.64
5.42	10.3013	3.67
5.45	10.3618	3.75
5.48	10.4236	3.81
5.51	10.4854	3.62
5.54	10.5472	3.81
5.57	10.609	3.87
5.66	10.7945	3.72
5.69	10.8563	3.67
5.81	11.1035	3.69
5.84	11.1653	3.69
5.87	11.2271	3.96
5.9	11.2889	3.78
5.99	11.4744	3.85
6.02	11.5362	3.71
6.23	11.9688	3.73
6.32	12.1543	3.56
6.35	12.2161	3.76
6.38	12.2779	3.66
6.5	12.5251	3.74
6.68	12.896	4.07
6.82	13.1844	4.18
6.85	13.2462	4.08
6.91	13.3698	4.13
6.94	13.4317	4.39
6.97	13.4935	4.13
7.15	13.8643	4.4
7.18	13.9261	4.41
7.21	13.9879	4.48
7.24	14.0497	4.32
7.27	14.1116	4.3
7.3	14.1734	4.53
7.33	14.2352	4.47
7.39	14.3588	4.4
7.42	14.4828	4.47
7.45	14.731	4.28
7.48	14.9793	4.36
7.51	15.2275	4.02
7.54	15.4758	4.3
7.57	15.724	4.39
7.6	15.9723	4.28
7.63	16.2206	4.39
7.66	16.4688	4.48
7.69	16.7171	4.4
7.72	16.9653	4.37
7.78	17.4619	4.48
8.11	20.1927	4.78
8.23	21.1857	4.98
8.39	22.5098	4.78
8.42	22.758	4.8
8.45	23.0063	4.71
8.48	23.2546	4.71
8.57	23.9993	4.72
8.69	24.9924	5.06
8.78	25.7371	5.12
8.81	25.9854	5.1
8.95	27.1439	4.93
9.02	27.7232	4.98
9.05	27.9715	5.17
9.08	28.2197	5.05
9.11	28.468	5
9.14	28.7162	5.08
9.17	28.9645	4.88
9.2	29.2841	4.86
9.23	29.7465	4.87
9.26	30.2088	4.83
9.29	30.6712	5
9.65	36.2194	4.58
9.71	37.0149	4.55
10.3	38.4831	4.5
10.5	38.9808	4.45
11.51	41.4941	3.89
11.56	41.6185	4.03
11.61	41.7429	3.92
11.66	41.8673	3.85
11.71	41.9918	3.98
11.76	42.1162	4.65
11.81	42.2406	4.63
12.81	44.729	4.35
12.91	44.9779	4.06
13.11	45.4756	4.07
13.16	45.5938	3.98
13.21	50.8091	3.99
13.26	50.9944	4.02
13.31	51.1797	3.89
13.36	51.365	3.91
13.41	51.5503	3.9
13.46	51.7357	3.91
13.51	51.921	4.02
13.56	52.1063	4.04
13.61	52.2916	4.02

## Sheet: MD07-3128 
Depth [m]	Age [kyr BP]	d18Opachy
0.01	2.46	1.068
0.13	5.63	1.985
0.25	8.79	1.421
0.37	10.71	1.586
0.49	11.49	1.718
0.61	12.27	1.629
0.73	13.05	1.777
0.85	13.83	1.365
0.97	14.6	1.438
1.09	15.3	1.359
1.21	16	1.766
1.33	16.7	1.763
1.45	17.4	1.873
1.57	18	2.237
1.69	18.09	2.019
1.81	18.18	2.246
1.93	18.27	2.363
2.05	18.36	1.99
2.17	18.45	2.378
2.29	18.54	2.305
2.41	18.62	2.082
2.53	18.72	2.339
2.63	18.8	1.716
2.77	18.92	2.172
2.89	19.03	2.229
3.01	19.13	2.326
3.13	19.24	2.113
3.25	19.34	2.12
3.37	19.44	1.697
3.49	19.55	2.205
3.61	19.65	2.232
3.77	19.79	2.429
3.89	19.9	2.277
4.05	20.03	1.635
4.17	20.13	1.932
4.29	20.23	2.092
4.41	20.33	1.563
4.53	20.43	1.443
4.65	20.53	1.922
4.77	20.63	1.801
4.89	20.73	1.89
5.01	20.83	1.959
5.13	20.93	1.879
5.25	21.03	1.889
5.37	21.13	2.308
5.49	21.23	1.988
5.61	21.33	1.926
5.73	21.43	1.845
5.85	21.52	1.993
5.97	21.62	1.971
6.09	21.72	2.2
6.21	21.82	2.329
6.33	21.92	2.177
6.45	22.02	2.055
6.57	22.12	2.364
6.69	22.22	2.122
6.81	22.32	2.304
6.93	22.42	2.026
7.05	22.56	2.241
7.17	22.75	1.908
7.29	22.95	2.256
10.02	26.68	2.305
10.4	26.79	2.656

## Sheet: RC13-271
Depth [m]	Age [kyr BP]	d18Opachy
0.08	0.2
0.1	0.2	2.5
0.2	0.4	2.92
0.3	0.6	2.67
0.4	0.8	2.72
0.5	1	3.11
0.53	1.1
0.6	1.2	2.85
0.7	1.4	2.87
0.9	1.8	2.68
1	2	3.03
1.1	2.2	2.88
1.2	2.4	2.63
1.3	2.6	2.34
1.4	2.8	2.9
1.5	3	2.58
1.6	3.2	2.63
1.7	3.4	2.88
1.8	3.6	2.91
2	4	2.97
2.05	4.1
2.1	4.2	2.6
2.2	4.4	2.6
2.3	4.6	2.41
2.4	4.8	2.74
2.5	5	2.76
2.7	5.4	3.01
2.8	5.6	2.75
3.03	6.1
3.1	6.2	2.95
3.2	6.4	2.85
3.3	6.6	2.67
3.4	6.8	2.87
3.5	7	2.8
3.6	7.2	2.67
3.8	7.6	2.69
3.9	7.8	2.76
4	8	2.89
4.1	8.2	2.92
4.2	8.4	2.18
4.3	8.6	2.35
4.4	8.8	2.45
4.5	9	2.51
4.6	9.2	2.46
4.7	9.4	2.51
4.9	9.8	2.83
5	10	2.72
5.1	10.2	2.68
5.2	10.4	2.72
5.3	10.6
5.4	10.8
5.48	11
5.5	11	2.75
5.6	11.2	2.83
5.7	11.4	2.75
5.8	11.6	2.69
5.9	11.8
5.97	11.9
6	12	3.16
6.13	12.3
6.2	12.5
6.21	12.5	3.05
6.3	12.7
6.4	13	2.85
6.5	13.2
6.6	13.4
6.7	13.7
6.8	13.9
7	14.4	2.77
7.02	14.5
7.1	14.6
7.2	14.9
7.3	15.1
7.4	15.4
7.46	15.5
7.6	15.8
7.7	16.1	2.58
7.8	16.3
7.9	16.6
7.98	16.8
8	16.8	3.15
8.1	17
8.21	17.3	3.76
8.3	17.5
8.4	17.8
8.48	17.9
8.5	18	4.38
8.57	18.2
8.7	18.5	4.25
8.8	18.8
9	19.3	4.31
9.1	19.5
9.2	19.8
9.3	20	4.36
9.4	20.3
9.5	20.5	4.27
9.51	20.5
9.6	20.8
9.7	21
9.78	21.3	3.05
9.9	21.7
9.98	21.9
10	22	3.58
10.09	22.4
10.2	22.7
10.3	23.1	2.86
10.4	23.4
10.48	23.7
10.5	23.8	3.24
10.6	24.1
10.7	24.5
10.8	24.8
10.9	25.2
11	25.5	3.1

## Sheet: RS147-GC07
Depth [m]	Age [kyr BP]	d18Og,bull300-355
0.005	0.519	0.96
0.015	0.716
0.025	0.919	1.2
0.045	1.324	0.87
0.065	1.729	0.88
0.105	2.54	0.9
0.115	2.742	0.88
0.125	-0.999	1.27
0.145	3.35	0.93
0.165	3.756	0.8
0.185	4.161	0.94
0.205	4.566	0.72
0.215	4.769	0.74
0.225	-0.999	0.74
0.235	-0.999	0.88
0.245	-0.999	0.76
0.255	5.579	0.69
0.265	5.782	0.68
0.275	-0.999	0.81
0.285	-0.999	1
0.295	-0.999	0.96
0.305	6.593	1.08
0.315	6.795	1.27
0.325	-0.999	0.98
0.335	-0.999	1.07
0.345	-0.999	0.95
0.355	7.606	0.88
0.365	7.808	0.91
0.375	-0.999	0.84
0.385	-0.999	0.97
0.395	-0.999	0.9
0.405	10.87	0.91
0.415	11.142	1.02
0.425	11.413	1.24
0.435	-0.999	1.38
0.445	11.675	1.2
0.455	11.853	1.22
0.465	12.032	1.24
0.475	12.21	1.26
0.485	12.388	1.9
0.495	-0.999	1.37
0.505	13.304	1.6
0.515	13.378	1.88
0.525	13.451	1.91
0.535	-0.999	1.19
0.545	-0.999	1.84
0.555	13.672	2.08
0.565	13.746	2.07
0.575	13.819	1.69
0.58	13.856	-999
0.585	-0.999	1.76
0.595	-0.999	1.85
0.605	14.651	1.98
0.615	14.969	1.78
0.625	-0.999	1.95
0.635	-0.999	2.08
0.645	-0.999	2.1
0.655	16.242	2.38
0.665	16.302	2.26
0.675	16.361	2.65
0.685	-0.999	2.63
0.695	-0.999	2.67
0.705	16.54	2.59
0.715	16.599	2.64
0.725	-0.999	2.89
0.735	-0.999	2.9
0.745	16.778	3.04
0.755	17.022	2.92
0.765	17.266	3.03
0.775	-0.999	3.08
0.785	-0.999	3.01
0.795	-0.999	3.08
0.805	18.241	3.05
0.815	18.484	3.1
0.825	18.728	3.22
0.835	-0.999	3.29
0.845	-0.999	3.23
0.855	19.118	3.07
0.865	19.249	3.25
0.875	19.379	3.29
0.885	19.509	3.18
0.895	19.639	3.32
0.915	20.08	3.17
0.94	20.632	3.24
0.96	-0.999	3.16
0.965	21.184
0.98	-0.999	3.32
0.985	21.625
0.99	21.919	3.13
1.01	-0.999	3.27
1.015	23.388	-999
1.025	-0.999	3.23
1.045	-0.999	3.19
1.065	-0.999	3.35
1.085	27.5	3.36
1.115	29.72	3.2
1.125	-0.999	3.22
1.145	31.94	3.14
1.165	-0.999	3.15
1.185	34.94	3.06
1.21	-0.999	2.83
1.215	35.29	-999
1.225	-0.999	2.96
1.245	35.64	2.97
1.265	-0.999	2.96
1.285	36.107	2.69
1.305	-0.999	2.98
1.315	36.458	-999
1.415	37.625	2.91
1.515	38.793	3.02
1.615	40.02	3.11
1.715	42.517	-999
1.815	45.014	2.8
1.915	47.511	-999
2.015	50.009	2.68
2.115	52.506	-999
2.315	57.5	3.03
2.515	60.796	2.95
2.715	64.093	-999
2.915	67.389	-999
3.115	-0.999	2.95
3.315	73.982	-999
3.515	77.279	-999
3.715	80.575	-999
3.915	83.872	-999
4.115	87.168	-999
4.315	90.465	-999
4.515	93.761	-999
4.715	-0.999	-999
4.915	-0.999	-999

## Sheet: 181-1119
Depth [m]	Age [kyr BP]	d18O
0.05	1.02273	1.41
0.2	4.09091	1.35
0.32	6.34091	2.14
0.42	8.38636	1.69
0.6	12.2386	2.72
0.9	12.8035	3.57
1.06	13.1047	3.2
1.34	13.6319	2.98
1.56	14.0461	1.79
1.84	14.5733	1.91
2.34	15.2871	3.13
2.48	15.3782	2.48
2.84	15.6124	2.47
3.34	15.9376	2.16
3.84	16.2629	3.05
3.91	16.3084	3.14
4.42	16.7365	3.19
5.04	17.3017	2.66
5.54	17.5984	2.42
6.04	17.8952	3.1
6.31	18.0554	3.24
6.6	18.2415	3.18
7.08	18.6104	2.85
7.54	18.964	3.75
8.04	19.3482	2.84
8.44	19.6557	3.28
8.74	19.8862	2.92
9.14	20.1937	3.08
9.54	20.5011	2.86
10.05	20.8931	3.03
11.04	21.6493	3.29
11.56	22.0336	2.48
12.55	22.7654	3.03
12.74	22.9059	2.62
13.6	23.5416	2.71
14.59	25.1552	2.69
15.54	28.7461	2.4
16.54	32.5261	2.68

## Sheet: RC11-120
Depth [m]	Age [kyr BP]	d18O
0.05	2.2	1.88
0.1	3.4	1.96
0.15	4.8	1.965
0.2	6	1.96
0.25	7.2	2.11
0.3	8.3	2.38
0.35	9.6	2.3
0.4	10.8	2.59
0.45	12	2.74
0.5	13.2	2.98
0.55	14.3	2.95
0.6	15.4	3.37
0.65	16.6	3.28
0.7	17.7	3.475
0.75	18.9	3.37
0.8	20.1	3.33
0.85	21.3	3.45
0.9	22.3	3.34
0.95	23.4	3.31
1	24.6	3.35
1.05	25.7	3.32
1.1	27	3.22
1.15	28.1	3.07
1.2	29.3	3.04
1.25	30.6	3.1
1.3	31.8	3.19
1.35	33.3	2.95
1.4	34.4	3.1
1.45	35.9	2.98
1.5	37.4	3.05
1.55	38.9	3.07
1.6	40.4	2.94
1.65	41.8	2.98
1.7	43.3	2.96
1.75	44.8	2.9
1.8	46	2.92
1.85	47.9	2.66
1.9	49.6	2.89
1.95	51.5	2.92
2	53.5	2.82
2.05	56.4	2.8
2.1	58.7	3.04
2.15	61	2.8
2.2	63.2	3.16
2.25	65.4	3.18
2.3	66.6	2.79
2.35	68.5	3.04
2.4	70.1	2.85
2.45	71.6	2.82
2.5	72.8	2.71
2.55	74.1	2.59
2.6	75.3	2.53
2.65	76.6	2.51
2.7	77.8	2.59
2.75	79	2.44
2.8	80.2	2.47
2.85	81.5	2.42
2.9	83	2.37
2.95	84	2.4
3	86	2.71
3.05	87.8	2.61
3.1	89.6	2.62
3.15	91	2.58
3.2	92.4	2.68
3.25	93.8	2.6
3.3	95	2.6
3.35	96.2	2.4
3.4	97.2	2.53
3.45	97.8	2.47
3.5	98.7	2.45
3.55	99.3	2.4
3.6	100	2.52
3.65	102	2.45
3.7	103	2.48
3.75	105	2.46
3.8	107	2.62
3.85	109	2.48
3.9	111	2.61
3.95	113	2.42
4	115	2.34
4.05	117	2.14
4.1	119	2.23
4.15	120	1.83
4.2	123	1.88
4.25	124	1.89
4.3	126	1.91
4.35	128	2.28
4.4	129	2.68
4.45	130	2.81
4.5	132	3.24
4.55	133	3.15
4.6	134	3.44
4.65	135	3.313
4.7	136	3.52
4.75	137	3.18
4.8	138	3.27
4.85	139	3.42

## Sheet: MD84-527
Depth [m]	Age [kyr BP]	d18O
0	1	1.98
0.05	1.25
0.1	1.5	2.14
0.13	1.65
0.2	2	2.14
0.23	2.15
0.3	2.5	1.96
0.4	3	1.71
0.5	3.5	1.89
0.53	3.65
0.6	4	2.09
0.7	4.5	2.15
0.73	4.65
0.8	5	2.19
0.83	5.15
0.9	5.5	2.23
1	6	2.01
1.1	6.25	1.9
1.13	6.33
1.2	6.5	2.14
1.3	6.75	1.8
1.38	6.95
1.4	7	2.02
1.43	7.08
1.5	7.25	2.26
1.6	7.5	1.89
1.7	7.75	2.36
1.8	8	2.14
1.9	8.33	1.98
2	8.67	2.07
2.1	9	1.64
2.2	9.33	1.85
2.3	9.68	1.63
2.4	10.05	1.69
2.5	10.41	2.32
2.6	10.77	2.06
2.7	11.14	2.22
2.8	11.5	2.41
2.9	13.25	2.29
2.93	13.78
3	15	3.54
3.02	15.83	3.68
3.1	19.17	3.48
3.13	20.42
3.2	23.33	3.43
3.3	25.53	2.78
3.4	26.41	3.39
3.5	27.29	3.31
3.6	28.07	2.8
3.7	28.44	2.83
3.8	28.81	2.82
3.9	29.17	3.6
4	29.54	3.5
4.1	29.9	3.67
4.2	30.27	3.29

## Sheet: TN057-6
Depth [m]	Age [kyr BP]	d18O G. bulloides (permil)
0.03	0.83	1.61
0.06	1.66	1.3
0.09	2.48	1.78
0.12	3.31	1.53
0.15	4.14	1.47
0.18	4.97	1.79
0.21	5.79	1.83
0.24	6.62	1.29
0.27	7.45	1.99
0.3	8.28	1.8
0.33	9.1	2.03
0.36	9.93	2.12
0.39	10.76	2.05
0.42	11.59	2
0.45	12.41	2.56
0.48	13.24	2.68
0.51	14.07	2.34
0.54	14.9	2.69
0.57	15.74	2.96
0.6	16.58	2.91
0.63	17.42	3.13
0.66	18.26	3.3
0.69	19.1	3.09
0.72	19.94	3.08
0.75	20.78	3
0.78	21.62	3.32
0.81	22.46	2.46
0.84	23.3	3.29
0.87	24.15	3.02
0.9	24.99	2.8
0.93	25.83	2.76
0.96	26.67	2.1
0.99	27.51	2.17
1.02	28.35	2.31

[truncated: 119 more sheets: P69, MD96-2077, KNR159–5–36GGC, ABS, KNR140-51GGC, OCE326-GGC5, MD96-2048, GeoB10285, MD01-2378, GeoB10163, GeoB10083, GeoB 10038-4, V21-40, GeoB3129 3911, GeoB3104-1, V19-28, RC11-238, 10029-4, V21-30, V21-29 …]
