# Supplementary material for: Oxygen stable isotopes during the Last Glacial Maximum climate: perspectives from data–model ( i LOVECLIM) comparison
Source: Copernicus journal article supplement (doi:10.5194/cp-10-1939-2014), 2014-11-10
Supplement: Supplementary file 1 [file cp-10-1939-2014-supplement.zip]

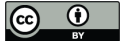

## *Supplement of*

# **Oxygen stable isotopes during the Last Glacial Maximum climate: perspectives from data–model (*i*LOVECLIM) comparison**

**T. Caley et al.**

*Correspondence to:* T. Caley (t.caley@vu.nl)

- Supplement-Cover-Letter.pdf
- Caley et al. Table\_S2\_Planktonic\_LGM\_CP(revised).xlsx
- Caley et al. Table\_S3\_Benthic\_LGM\_CP(revised).xls
- \_\_MACOSX
  - .\_Caley et al. Table\_S2\_Planktonic\_LGM\_CP(revised).xlsx
  - .\_Caley et al. Table\_S3\_Benthic\_LGM\_CP(revised).xls
