# Supplementary material for: Oxygen stable isotopes during the Last Glacial Maximum climate: perspectives from data–model ( i LOVECLIM) comparison
Source: Copernicus journal article supplement (doi:10.5194/cp-10-1939-2014), 2014-11-10
Supplement: Supplementary file 2 [file Caley et al. Table_S3_Benthic_LGM_CP(revised).xls]

## Sheet: synthesis
Core Name	Latitude	Longitude	Depth (m)	References	Doi	Foraminiferal species	Chronostratigraphic quality LGM ( MARGO definition)	Sample depth - upper (m)	Sample depth - lower (m)	δ18Oc LGM (19-23 kyr) (‰)	error (1σ)	no. data points in LGM average	Chronostratigraphic quality LH ( MARGO definition)	Sample depth - upper (m)	Sample depth - lower (m)	δ18Oc LH (‰)	error (1σ)	no. data points in LH average	δ18Oc LGM-LH (‰)	Error Anomaly (2σ)
TR163-19	2.255	-90.9511	2348	Lea et al;, 2002	10.1016/S0277-3791(01)00081-6	Uvigerina	3	0.74	0.89	4.675	0.088	4	4	0.01	0.04	3.09	0.09	2	1.585	0.251746
NIOP 905	10.77	51.95	1580	Jung et al., 2009	10.1016/j.epsl.2009.01.037	C. kullenbergi	2			3.61458	0.06	17	1			2.21527	0.02	51	1.39932	0.126491
RC13-229	-26	11	4194	Imbrie et al., 1992	10.1029/92PA02253	benthic	3	0.65	0.8	4.14167	0.07	5	4	0.025	0.065	2.6	0.14	3	1.54167	0.31305
V19-30	-3	-83	3091	Imbrie et al., 1992	10.1029/92PA02253	benthic	3	1.68	2.16	4.96444	0.06	17	4	0	0.14	3.4	0.08	4	1.56444	0.2
RC13-110	0	-96	3231	Mix et al., 1991	10.1594/PANGAEA.701404	C. wuellerstorfi	3	0.6	0.7	4.72667	0.1	3	4	0.001	0.001	3.39	0.08	1	1.33667	0.256125
ODP1012	32.2828	-118.384	1783	Herbert et al., 2001	10.1126/science.1059209	benthic	3	2.78	3.46	4.69333	0.06	8	4	0.28	0.4	3.26	0.03	3	1.43333	0.134164
LPAZ21P	22.99	-109.47	624	Herbert et al., 2001	10.1126/science.1059209	benthic	3	0.965	1.065	3.628	0.09	3	4	0.025	0.115	2.2	0.05	3	1.428	0.205913
TT013-PC72	0.11	-139.4	4298	Murray et al., 2000	10.1029/1999PA000457	C. wuellerstorfi	3	0.59	0.69	4.63	0.05	3	4	0.14	0.14	3.39	0.125	1	1.24	0.269258
MD02-2575	29	-87.12	847	Nuernberg et al., 2008	10.1016/j.epsl.2008.04.051	Uvigerina peregr.	2	3.3	4.4	4.32228	0.301553	22	1	0.05	0.5	3	0.0586414	9	1.32228	0.614404
NH8P	22.38	-107.07	1018	Ganeshram et al., 1998	10.1029/98PA02508	Bolivina spp	2	2.39	3.49	3.93	0.17	23	1	0.04	0.39	2.57	0.2	8	1.36	0.524976
NH22P	23.52	-106.52	2025	Ganeshram et al., 1998	10.1029/98PA02508	Uvigerina spp.	2	1.23	1.58	4.5	0.24	8	2	0.04	0.04	3.3	0.1	1	1.2	0.52
GeoB 10038-4	-5.94	103.25	1819	Mohtadi et al., 2010	10.1594/PANGAEA.736652	P. wuellerstorfi	2	1.78	2.03	3.96132	0.09	6	1	0.03	0.28	2.30422	0.42	6	1.65709	0.859069
Y69-71	0.1	-95.65	2740	Lyle et al., 2002	10.1029/2000PA000538	uvigerina	3	1.8	2.4	4.75	0.12	4	4	0.04	0.18	3.12	0.03	3	1.63	0.247386
V19-27	-0.46667	-82.0667	1373	Mix et al., 1991	10.1594/PANGAEA.701404	cibicides	3	1.02	1.3	4.45	0.14	7	4	0.05	0.25	2.92	0.12	6	1.53	0.368782
V19-28	-2.367	-84.65	2720	Lyle et al., 2002	10.1029/2000PA000538	Uvigerina	3	1.5	1.7	4.8	0.06	3	4	0	0	3.2	0.02	1	1.6	0.126491
KNR166-2 73GGC	23.7455	-79.43	542	Lynch-Stieglitz et al., 2011	10.1029/2010PA002032	C. pachyderma	2	2.3025	2.3625	2.64	0.12	16	1	0.0025	0.4025	1.24	0.06	37	1.4	0.268328
KNR166-2 26JPC	24.33	-83.25	546	Lynch-Stieglitz et al., 2011	10.1029/2010PA002032	C. pachyderma	2	7.6025	8.3025	2.74	0.61	19	1	0.075	0.4825	1.86	0.04	4	0.88	1.22262
KNR166-2 29JPC	24.22	-83.3	648	Lynch-Stieglitz et al., 2011	10.1029/2010PA002032	C. pachyderma and C. wuellerstorfi	2	1.8425	2.1625	3.23	0.32	18	1	0.0075	0.2025	2	0.06	20	1.23	0.651153
KNR166-2 31JPC	24.76	-83.27	751	Lynch-Stieglitz et al., 2011	10.1029/2010PA002032	C. pachyderma and C. wuellerstorfi	1	1.6025	2.2425	3.58	0.14	45	2	0.0075	0.1425	2.09	0.15	14	1.49	0.410366
KNR166-2 127JPC	24.85	-79.27	631	Lynch-Stieglitz et al., 2011	10.1029/2010PA002032	C. pachyderma	2	9.1425	9.1625	2.53	0.37	26	1	1.005	3.105	1.31	0.07	19	1.22	0.753127
KNR166-2 132JPC	24.28	-79.28	739	Lynch-Stieglitz et al., 2011	10.1029/2010PA002032	C. pachyderma, P. ariminensis, Cibici sp.	2	4.8425	4.8625	2.59	0.57	19	1	0.105	1.905	1.65	0.19	25	0.94	1.20167
TR163-22	0.005	-92.4	2830	Lea et al., 2006	10.1016/j.quascirev.2005.11.010	Uvigerina	2	1.58	2	4.79	0.14	21	1	0.02	0.12	3.23	0.14	5	1.56	0.39598
P69	-40.397	177.997	2195	Weaver et al., 1998	10.1029/97PA02982	Uvigerina	3	4.2	5.61	4.78	0.21	10	4	0.15	0.45	3.42	0.03	1	1.36	0.424264
IODP Site U1308	49.878	-24.24	3883	Hodell et al., 2008	10.1594/PANGAEA.831743	C. wuellerstorfi	1	1.04	1.22	4.35	0.3	14	4	0	0.16	2.77	0.07	9	1.58	0.616117
ODP 984C	61.425	-24.08	1648.5	Praetorius et al., 2008	10.1038/ngeo227	C. wuellerstorfi	1	3.49	4.31	4.67	0.12	16	1	0.01	0.81	2.74	0.19	13	1.93	0.449444
ODP980	55.485	-14.7017	2168	Flower et al., 2000	10.1029/1999PA000430	C. wuellerstorfi	3	4.62	5.32	4.5	0.14	4	4	0.01	0.51	2.57	0.16	13	1.93	0.425206
AHF16832	31.6667	-118.183	1915	Stott et al., 2000	10.1029/1999PA000375	Cibicides mckannai	3	2	2.39	4	0.09	5	4	0.04	0.1	2.6	0.115	2	1.4	0.292062
EW9504-03	32.0667	-117.367	1299	Stott et al., 2000	10.1029/1999PA000375	Cibicides mckannai	2	0.93	1.08	3.53	0.17	4	4	0	0.18	2.37167	0.16	5	1.15833	0.466905
EW9504-08	32.8	-118.8	1442	Stott et al., 2000	10.1029/1999PA000375	Cibicides mckannai	2	1.45	1.67	3.55	0.22	3	3	0.02	0.22	2.5775	0.43	4	0.9725	0.966023
EW9504-09	32.8667	-119.967	1194	Stott et al., 2000	10.1029/1999PA000375	Cibicides mckannai	2	2.08	2.4	3.662	0.07	4	1	0.02	0.26	2.3625	0.05	4	1.2995	0.172047
EW9504-02	31.25	-117.583	2042	Stott et al., 2000	10.1029/1999PA000375	Cibicides mckannai	2	0.7	0.8	4.1	0.07	3	3	0.1	0.1	2.67	0.01	1	1.43	0.141421
EW9504-05	32.4833	-118.133	1818	Stott et al., 2000	10.1029/1999PA000375	Cibicides mckannai	2	1.26	1.5	4.5475	0.03	4	4	0.02	0.08	2.55	0.05	2	1.9975	0.116619
EW9504-04	32.2833	-118.4	1759	Stott et al., 2000	10.1029/1999PA000375	Cibicides mckannai	2	1.61	1.91	3.824	0.032	5	3	0.02	0.16	2.4	0.06	2	1.424	0.136
GeoB7920-2	20.7517	-18.5817	2278	Tjallingii et al., 2008	10.1038/ngeo289	C. wuellerstorfi	3	2.68	2.98	4.35	0.17	7	4	0.03	0.28	2.66	0.05	6	1.69	0.354401
KT90-9, 5	41.12	143.52	2098	Oba and Murayama, 2004	10.1002/jqs.843	Elphidium batialis	2	3.5	4.3	4.06	0.15	9	4	0	0.6	2.75	0.03	7	1.31	0.305941
KH94-3,LM-8	38.88	143.367	2353	Oba and Murayama, 2004	10.1002/jqs.843	Uvigerina senticosa	2	2.087	2.451	4.69	0.07	6	1	0	0.4	3.23	0.08	6	1.46	0.212603
MD01-2421	36.02	141.78	2224	Oba and Murayama, 2004	10.1002/jqs.843	Bulimina aculeata	2	9.69	10.63	5.04	0.13	4	1	0.06	2.85	3.46	0.17	16	1.58	0.428019
MD02-2503	34.28	-120.04	570	Hill et al., 2006	10.1029/2005PA001186	B. argentea	3	27.825	31.015	3.66	0.06	8	4	0.205	4.195	2.154	0.32	16	1.506	0.651153
TN057-6	-42.9014	8.9	3751	Hodell et al., 2003	10.1016/S0921-8181(99)00069-7	Cibicidoides sp.	3	0.78	0.81	4.08	0.07	2	4	0.09	0.09	2.6	0.07	1	1.465	0.19799
RS147-GC07	-45.15	146.28	3300	Sikes et al., 2009	10.1594/PANGAEA.831970	Cibicidoides sp.	1	0.855	0.99	4.47	0.06	5	1	0.005	0.115	3.255	0.1	2	1.215	0.233238
GeoB1720-2	-28.98	13.83	1997	Dickson et al., 2009	10.1038/ngeo527	C. Wuellerstorfi	3	0.785	0.905	4.32	0.05	5	4	0.035	0.095	2.6	0.07	3	1.72	0.172047
KNR166-2-31JPC	24.22	-83.3	751	Came et al., 2008	10.1029/2007PA001450	Cibicidoides spp	2	1.6	1.725	3.71	0.11	8	1	0.005	0.1425	2.13	0.16	12	1.58	0.38833
OCE205-2-100GGC	26.06	-78.03	1057	Came et al., 2009	10.1029/173GM16	Cibicidoides spp	2	1.37	1.4	4.02	0.09	6	1	0.07	0.31	2.27	0.17	42	1.75	0.384708
SCS90-36	17.995	111.494	2050	Huang et al., 1997	10.1594/PANGAEA.738493	C. wuellerstorfi	2	0.93	0.96	3.26	0.285	2	1	0	0.09	2.2	0.14	4	1.06	0.635059
MD06-3067	6.51433	126.498	1575	Bolliet et al., 2011	10.1594/PANGAEA.770288	Planulina wuellerstorfi and/or Cibicidoides mundulus	1	2.79	3.24	4.04	0.07	28	2	0.11	0.11	2.61	0.068	1	1.43	0.195182
167-1014	32.8339	-119.981	1166	Hendy and Kennett, 2000	10.1594/PANGAEA.742765	Uvigerina spp.	3	2.35	2.85	4.361	0.08	6	4	0.15	0.45	2.85	0.165	4	1.511	0.366742
GIK23519-5	64.7973	-29.5958	1893	Millo et al., 2006	10.1594/PANGAEA.271549	C. wuellerstorfi	2	0.73	1.03	4.51	0.16	42	3	0.02	0.05	2.6	0.1	4	1.91	0.377359
167-1017E	34.535	-121.107	955.5	Kennett et al., 2000	10.1594/PANGAEA.774023	U. peregrina curticosta	1	4.005	4.457	4.339	0.13	17	4	0.045	0.615	2.92	0.13	11	1.419	0.367696
MD84-527	-43.49	51.19	3262	Pichon et al., 1992	10.1594/PANGAEA.727840	Benthics	3	3.1	3.2	4.98	0.04	3	1	0	0.4	3.548	0.21	5	1.432	0.427551
PS2561-2	-41.8583	28.5417	4465	Kruger et al., 2008	10.1594/PANGAEA.774839	Fontbotia wuellerstorfi	3	1.07	1.35	4.53214	0.07	28	4	0	0.15	3.12154	0.14	13	1.4106	0.31305
MD01-2378	-13.0825	121.788	1783	Holbourn et al., 2005	10.1594/PANGAEA.738105	Planulina wuellerstorfi	1	3.62	4.22	4	0.041	8	1	0.06	0.46	2.34	0.05	4	1.66	0.129321
MD04-2861	24.13	63.91	2049	Caley et al., 2011	10.1016/j.epsl.2011.06.019	Planulina wuellerstorfi	1	4.3	4.8	3.95	0.19	3	1	0.1	0.5	2.36	0.1	4	1.59	0.429418
ODP1087	-31.467	15.32	1371	Caley et al., 2012	10.1073/pnas.1115545109	Planulina wuellerstorfi	3	0.75	0.8	3.97	0.1	2	4	0	0.1	2.49	0.03	3	1.48	0.208806
MD96-2048	-26.167	34.02	660	Caley et al., 2011	10.5194/cp-7-1285-2011, 2011	Planulina wuellerstorfi	3	0.68	0.88	3.21	0.05	6	4	0	0.08	1.66	0.02	3	1.55	0.107703
SU92-03	43.1958	-10.113	3005	Salgueiro et al., 2010	10.1594/PANGAEA.743085	Cibicidoides spp. + Uvigerina spp.	2	1.025	1.375	5.34	0.09	8	2	0.075	0.085	3.83	0.29	2	1.51	0.607289
GeoB9526-5	12.435	-18.0567	3223	Zarriess and Mackensen, 2011	10.1594/PANGAEA.756414	C. wuellerstorfi	2	2.25	2.55	4.44	0.065	7	1	0.03	0.35	2.9	0.05	4	1.54	0.164012
GeoB3104-1	-3.66667	-37.7167	767	Arz et al., 1998	10.1594/PANGAEA.711735	P. ariminensis	2	1.705	1.955	3.54	0.12	8	2	0.03	0.08	2.28	0.037	3	1.26	0.251149
KNR159-5-42JPC	-27.6	-45.81	2296	Hoffman and Lund, 2012	10.1029/2011PA002216	Cibicidoides spp	1	0.6325	0.805	4.55	0.085	5	3	0.005	0.0625	2.54	0.08	12	2.01	0.233452
CH69-K09	41.76	-47.35	4100	Labeyrie et al., 1992; 1999; Waelbroeck et al., 2001	10.1038/35089060	C. wuellerstorfi	2	3.1	3.3	4.36	0.1	11	1	0	0.2	2.85	0.11	6	1.51	0.297321
CH73-139C	54.64	-16.36	2209	Duplessy et al., 1984	10.1016/0033-5894(84)90099-1	Cibicidoides spp	1	1.65	2	4.54	0.11	5	1	0	0.1	2.59		1	1.95	0.22
CH75-03	10.05	-57.53	3410	Duplessy et al., 1988	10.1029/PA003i003p00343	C. wuellerstorfi	4	1.4	1.5	4.59	0.04	2	4	0	0	2.8		1	1.79
CH75-04	10.01	-56.01	3820	Duplessy et al., 1988; Curry et al. (1988)	10.1029/PA003i003p00343	C. wuellerstorfi	4	1.25	1.45	4.5	0.02	3	4	0	0	2.74		1	1.76
CH77-03	57.93	-29.1	2271	Vidal et al., 1997.	10.1016/S0012-821X(96)00192-6	Cibicidoides spp	4	1.5	1.7	4.35	0.08	3	4	0	0.1	2.8	0.1	2	1.55	0.256125
CH84-04	36.77	142.22	2630	LSCE unpublished data		Uvigerina spp.	2	4.7	4.8	5.26	0.02	2	4	0	0	3.54		1	1.72
CH84-14	41.73	142.55	978	LSCE unpublished data		Uvigerina spp.							2	0	0.7	3.36	0.06	4
CHO288-54	17.82	-77.66	1020	LSCE unpublished data		C. wuellerstorfi	1	1.07	1.25	3.81	0.09	8	1	0	0.2	2.25	0.08	14	1.56	0.240832
DSDP506	0.6	-86.1	2707	LSCE unpublished data		Uvigerina spp.	4	1.38	1.62	5.17	0.09	2	4	0.09	0.09	3.58		1	1.59
DSDP508	0.53	-86.1	2783	LSCE unpublished data		Uvigerina spp.	4	1.3	1.3	4.99		1	4	0.3	0.3	3.35061		1	1.63939
ENAM97-09	54.89	-16.59	2452	LSCE unpublished data		C. wuellerstorfi	4	1.1	1.25	4.24	0.08	4	4	0	0.5	2.63	0.15	6	1.61	0.34
KW-31	3.51	5.57	1181	Pastouret et al., 1978.		Cpu	2	8.8	8.86	3.86		1	2	0	0.5	2.32	0.01	2	1.54	0.02
MD00-2374	-46.03	96.48	3250	LSCE unpublished data, Duplessy et al., 2007	10.1126/science.1138582	Cibicidoides spp	3	1.75	2.6	4.49	0.11	16	2	0	0	2.79	0.02	4	1.7	0.223607
MD02-2488	-46.48	88.02	3420	LSCE unpublished data		Ck and CW	1	3.8	6.2	4.39	0.08	48	1	0	0.35	2.86	0.09	16	1.53	0.240832
MD03-2697	42.16	-9.7	2164	LSCE unpublished data		GA	4	3.4	5	5.55	0.08	11	4	0	0.2	3.56	0.01	2	1.99	0.161245
MD03-2697	42.16	-9.7	2164	LSCE unpublished data		C. wuellerstorfi	4	3.4	5	4.16	0.26	3	4	0	0.2	2.43	0.14	6	1.73	0.590593
MD04-2812	37.88	-10.09	2901	LSCE unpublished data		C. wuellerstorfi	4	3.9	4.3	4.2	0.06	3	4	0	0.9	2.62	0.06	6	1.58	0.169706
MD07-3076CQ	-44	-14.23	3770	Waelbroeck et al., Paleoceanography 2011	10.1029/2010PA002007	CK	1	1.34	1.6	4.41	0.08	13	1	0	0.08	2.76	0.04	4	1.65	0.178885
MD07-3088	-46.07	-75.69	1540	Siani et al., Nature communication 2013	10.1038/ncomms3758	C. wuellerstorfi	1	12.6	18.9	4.1037	0.0928612	35	1	0.01	1.7	2.59189	0.0643425	22	1.51181	0.225948
MD08-3167	-23.32	12.37	1948	LSCE unpublished data		C. wuellerstorfi	1	3.2	3.95	4.38	0.1	19	1	0	0.08	2.54	0.1	19	1.84	0.282843
MD08-3182CQ	52.7	-35.94	3757	LSCE unpublished data		C. wuellerstorfi	4	9.3	9.4	4.09	0.05	4	1	0	0.75	2.72	0.09	50	1.37	0.205913
MD76-125	8.58	75.33	1878	Duplessy et al., 1984	10.1016/0033-5894(84)90099-1	C. wuellerstorfi	4	1.3	1.4	3.91	0.13	2	4	0	0	2.49		1	1.42
MD76-125	8.58	75.33	1878	Duplessy et al., 1984	10.1016/0033-5894(84)90099-1	Uvigerina peregr.	4	1.3	1.4	4.73	0.02	2	4	0	0	3.13		1	1.6
MD76-127	12.08	75.9	1610	Kallel et al., 1988	10.1038/333651a0	C. wuellerstorfi	4	0.5	0.5	3.66	0.07	3	4	0	0	2.4		1	1.26
MD76-131	15.53	72.57	1230	LSCE unpublished data		C. wuellerstorfi	4	2.4	2.5	3.39		1	4	0.1	0.1	1.69		1	1.7
MD76-135	14.44	50.52	1895	Duplessy, 1982, Kallel et al., 1988	10.1038/295494a0	C. wuellerstorfi	4	2.4	2.4	4.08		1	1	0	0.2	2.34	0.11	4	1.74
MD77-169	10.21	95.05	2360	Kallel et al., 1988.	10.1038/333651a0	C. wuellerstorfi	2	1.65	2	3.62	0.17	9	2	0	0.2	2.16	0.04	4	1.46	0.349285
MD77-171	11.76	94.15	1760	Kallel et al., 1988.	10.1038/333651a0	Cibicidoides spp	4	3.1	3.7	3.6	0.1	5	4	0	0.5	2.29		1	1.31
MD77-181	17.4	90.48	2271	Kallel et al., 1988.	10.1038/333651a0	C. wuellerstorfi	4	1.3	1.7	4.2	0.04	3	4	0	0	2.77264		1	1.42736
MD77-194	10.47	75.23	1222	LSCE unpublished data		Uvigerina peregr.	2	3.55	4.4	4.09	0.08	54	4	0	0.2	2.8	0.16	8	1.29	0.357771
MD77-203	20.7	59.57	2442	Kallel et al., 1988.	10.1038/333651a0	PW	4	4	4.5	3.99	0.043	2	4	0	0.1	2.46	0	2	1.53	0.086
MD79-254	-17.88	38.67	1934	Duplessy et al., 1985; Van Campo et al., 1990	10.1038/348209a0	C. wuellerstorfi	1	1.9	2.43	4.12	0.08	7	4	0	0.1	2.61	0.06	3	1.51	0.2
MD79-256	-19.57	37.03	1222	LSCE unpublished data		Uvigerina spp.	3	4.2	4.6	4.45	0.12	2	4	0	0	2.9		1	1.55
MD79-257	-20.4	36.33	1262	Duplessy et al., 1991	10.1016/0012-821X(91)90147-A	Uvigerina spp.	1	6.1	6.6	4.5	0.13	18	1	0	0	2.91	0.03	4	1.59	0.266833
MD79-257	-20.4	36.33	1262	Duplessy et al., 1991	10.1016/0012-821X(91)90147-A	Cibicides sp	1	6.1	6.6	3.84	0.17	8	1	0	0	2.18	0.14	2	1.66	0.440454
MD85-666	-0.18	44.27	3045	LSCE unpublished data		C. wuellerstorfi	4	0.55	0.6	4.34	0.07	2	4	0	0.05	2.49	0.12	2	1.85	0.277849
MD88-770	-46.02	96.45	3290	Labeyrie et al., 1996	10.1029/95PA02255	Cibicidoides spp	2	1.1	2.2	4.64	0.06	10	3	0	0.1	3.01	0.08	2	1.63	0.2
MD88-770	-46.02	96.45	3290	Labeyrie et al., 1996	10.1029/95PA02255	Uvigerina peregr.	2	1.1	2.2	5.21	0.12	3	3	0	0.1	3.51	0.12	2	1.7	0.339411
MD88-770	-46.02	96.45	3290	Labeyrie et al., 1996	10.1029/95PA02255	MB	2	1.1	2.2	4.91	0.08	8	3	0	0.1	3.14		1	1.77
MD95-2003	55.18	-14.76	2365	LSCE unpublished data		C. wuellerstorfi	4	5.2	5.2	4.4		1	4	0	0.2	2.56	0.06	2	1.84
MD95-2037	37.08	-32.03	2159	Labeyrie et al., 2005; Waelbroeck et al., 2011	10.1029/2010PA002007	C. wuellerstorfi	2	3.85	4.3	4.42	0.1	11	2	0	0.2	2.27	0.13	3	2.15	0.328024
MD96-2077	-33.17	31.23	3781	LSCE unpublished data		C. wuellerstorfi	4	0.94	1.1	4.37	0.03	5	4	0	0.1	2.78	0.05	2	1.59	0.116619
MD97-2101	-43.5	79.77	3200	LSCE unpublished data		CK-CW	3	1.1	1.26	4.43	0.12	7	4	0	0	2.89		1	1.54
MD98-2165	-9.65	118.34	2100	Waelbroeck et al., 2006	10.1016/j.epsl.2005.12.031	Cibicidoideswuell + ung	1	7.04	7.4	4.18	0.06	25	1	0	1.3	2.44	0.04	7	1.74	0.144222
MD98-2172	-8.52	128.15	1768	LSCE unpublished data		C. wuellerstorfi	2	5.4	6.17	3.86	0.09	26	2	0	1.85	2.39	0.09	7	1.47	0.254558
MD98-2182	3.3	132.11	3574	LSCE unpublished data		C. wuellerstorfi	4	2.2	3.4	4.31	0.1	2	4	0	0.2	2.7	0.03	2	1.61	0.208806
MD99-2331	42.15	-9.69	2120	LSCE unpublished data		C. wuellerstorfi	4	4.6	6.4	4.26	0.1	6	4	0	0.03	2.32			1.94
NA87-22	55.5	-14.7	2161	Vidal et al., 1997; Waelbroeck et al., 2001	10.1038/35089060	C. wuellerstorfi	1	3.8	4.63	4.61	0.12	32	1	0	0.45	2.71	0.08	10	1.9	0.288444
NA87-25	55.2	-14.75	2320	Duplessy et al. QSR, 2002; Waelbroeck et al., 2002	10.1016/S0277-3791(01)00101-9	C. wuellerstorfi	4	2.23	2.43	4.39	0.07	2	3	0	0.2	2.69	0.11	4	1.7	0.260768
NO78-007	34.33	-7.02	700	Labeyrie et al., 1992.	10.1016/0277-3791(92)90022-Z	Uvigerina mediterranea	4	3.65	3.8	4.22	0.02	2	4	0	0.2	2.22		1	2
SHI90-22	-11.58	122.05	2313	LSCE unpublished data		Cibicidoides spp	1	5.45	6.1	4.17	0.08	7	2	0	1.1	2.57	0.12	16	1.6	0.288444
SHI90-22	-11.58	122.05	2313	LSCE unpublished data		Uvigerina spp.	1	5.45	6.1	4.95	0.11	9	2	0	1.1	3.31	0.15	5	1.64	0.372022
SHI90-26	-9.88	118.09	2466	LSCE unpublished data		Cibicidoides spp	4	0.59	0.69	4.2	0.28	2	4	0	0	2.73		1	1.47
SI51-GC-21	-15.54	146.94	1630	LSCE unpublished data		C. wuellerstorfi	4	0.19	0.19	4.06		1	4	0.04	0.04	2.45		1	1.61
SU90-08	43.05	-30.04	3080	Vidal et al., 1997	10.1016/S0012-821X(96)00192-6	C. wuellerstorfi	2	0.82	1.04	4.6	0.09	12	4	0	0.05	2.54	0.07	2	2.06	0.228035
SU90-33	60.57	-22.09	2370	Bout-Ramazeille et al., 1997, Vidal et al., 1997	10.1016/S0012-821X(96)00192-6	Cibicidoides spp	2	0.58	0.75	4.53	0.06	4	2	0	0.08	3.02		1	1.51
SU92-28	37.1	-9.48	997	LSCE unpublished data		Cibicidoides spp	2	2.2	2.6	3.32	0.08	9	1	0	0.45	1.43	0.05	6	1.89	0.18868

## Sheet: RS147-GC07
Depth [m]	Age [kyr BP]	d18Ocibid>150
0.005	0.519	-999
0.015	0.716	-999
0.025	0.919	-999
0.045	1.324	3.16
0.065	1.729	-999
0.105	2.54	3.35
0.115	2.742	-999
0.125	-0.999	-999
0.145	3.35	-999
0.165	3.756	3.15
0.185	4.161	-999
0.205	4.566	3.27
0.215	4.769	3.11
0.225	-0.999	-999
0.235	-0.999	3.31
0.245	-0.999	-999
0.255	5.579	3.2
0.265	5.782	-999
0.275	-0.999	3.04
0.285	-0.999	-999
0.295	-0.999	-999
0.305	6.593	3
0.315	6.795	-999
0.325	-0.999	3.24
0.335	-0.999	-999
0.345	-0.999	-999
0.355	7.606	3.1
0.365	7.808	-999
0.375	-0.999	-999
0.385	-0.999	-999
0.395	-0.999	-999
0.405	10.87	3.31
0.415	11.142	-999
0.425	11.413	-999
0.435	-0.999	3.11
0.445	11.675	-999
0.455	11.853	3.3
0.465	12.032	-999
0.475	12.21	3.41
0.485	12.388	3.74
0.495	-0.999	-999
0.505	13.304	3.68
0.515	13.378	-999
0.525	13.451	3.71
0.535	-0.999	3.35
0.545	-0.999	3.27
0.555	13.672	-999
0.565	13.746	3.74
0.575	13.819	-999
0.58	13.856	-999
0.585	-0.999	3.71
0.595	-0.999	-999
0.605	14.651	3.88
0.615	14.969	-999
0.625	-0.999	4.06
0.635	-0.999	-999
0.645	-0.999	-999
0.655	16.242	4.14
0.665	16.302	-999
0.675	16.361	4.29
0.685	-0.999	-999
0.695	-0.999	-999
0.705	16.54	4.28
0.715	16.599	4.18
0.725	-0.999	-999
0.735	-0.999	-999
0.745	16.778	4.41
0.755	17.022	-999
0.765	17.266	4.35
0.775	-0.999	-999
0.785	-0.999	-999
0.795	-0.999	4.25
0.805	18.241	-999
0.815	18.484	-999
0.825	18.728	-999
0.835	-0.999	4.43
0.845	-0.999	-999
0.855	19.118	4.38
0.865	19.249
0.875	19.379	4.47
0.885	19.509
0.895	19.639	4.49
0.915	20.08
0.94	20.632	4.54
0.96	-0.999
0.965	21.184
0.98	-0.999
0.985	21.625
0.99	21.919	4.47
1.01	-0.999	-999
1.015	23.388	-999
1.025	-0.999	-999
1.045	-0.999	4.51
1.065	-0.999	-999
1.085	27.5	4.27
1.115	29.72	-999
1.125	-0.999	-999
1.145	31.94	4.33
1.165	-0.999	-999
1.185	34.94	4.31
1.21	-0.999	-999
1.215	35.29	-999
1.225	-0.999	-999
1.245	35.64	4.05
1.265	-0.999	-999
1.285	36.107	4.04
1.305	-0.999	-999
1.315	36.458	-999
1.415	37.625	-999
1.515	38.793	-999
1.615	40.02	-999
1.715	42.517	-999
1.815	45.014	-999
1.915	47.511	-999
2.015	50.009	-999
2.115	52.506	-999
2.315	57.5	-999
2.515	60.796	-999
2.715	64.093	-999
2.915	67.389	-999
3.115	-0.999	-999
3.315	73.982	-999
3.515	77.279	-999
3.715	80.575	-999
3.915	83.872	-999
4.115	87.168	-999
4.315	90.465	-999
4.515	93.761	-999
4.715	-0.999	-999
4.915	-0.999	-999

## Sheet: TN057-6
Depth [m]	Age [kyr BP]	d18O C. wuellerstorfi (permil)
0.03	0.83
0.06	1.66
0.09	2.48	2.58
0.12	3.31
0.15	4.14
0.18	4.97
0.21	5.79
0.24	6.62
0.27	7.45
0.3	8.28
0.33	9.1
0.36	9.93
0.39	10.76	2.79
0.42	11.59
0.45	12.41	3.59
0.48	13.24	3.95
0.51	14.07	4.09
0.54	14.9	4.03
0.57	15.74	3.59
0.6	16.58
0.63	17.42
0.66	18.26
0.69	19.1
0.72	19.94
0.75	20.78
0.78	21.62	4.03
0.81	22.46	4.13
0.84	23.3
0.87	24.15	4.21
0.9	24.99
0.93	25.83	3.72
0.96	26.67
0.99	27.51	3
1.02	28.35	4.15

## Sheet: MD96-2048
Depth [m]	Age [kyr BP]	d18O
0	0	1.67
0.04	1.43534	1.68
0.08	2.89077	1.63
0.12	4.34955	1.7
0.16	5.80833	1.79
0.24	8.72589	1.74
0.28	10.1847	1.79
0.32	11.6435	2.24
0.36	12.8517	2.37
0.4	13.6377	3.08
0.44	14.4237	3.01
0.48	15.2097	2.97
0.52	15.9957	2.9
0.6	17.5677	3.22
0.64	18.3537	3.32
0.68	19.1397	3.13
0.72	19.9257	3.27
0.76	20.7117	3.19
0.8	21.4977	3.19
0.84	22.2837	3.29
0.88	23.0697	3.21
0.92	23.8557	3.18
0.96	24.9512	2.95
1	26.374	2.98
1.04	27.7968	2.87
1.08	29.2196	2.95
1.12	30.6423	2.82

## Sheet: MD01-2378
Depth [m]	Age [kyr BP]	d18O
0.06	1.05	2.32
0.26	2.04	2.37
0.36	2.51	2.31
0.46	3	2.44
0.56	3.47	2.5
0.66	3.94	2.38
0.76	4.42	2.23
0.86	4.9	2.19
0.96	5.38	2.47
1.06	5.86	2.52
1.16	6.31	2.46
1.26	6.77	2.33
1.36	7.26	2.41
1.46	7.74	2.52
1.53	8.09	2.55
1.63	8.59	2.61
1.73	9.09	2.64
1.83	9.59	2.65
1.93	10.09	2.94
2.03	10.59	2.75
2.13	11.09	2.67
2.23	11.59	2.93
2.33	12.11	3.11
2.43	12.63	2.81
2.53	13.17	3.03
2.63	13.7	3.33
2.73	14.23	3.15
2.83	14.77	3.27
2.93	15.31	3.37
3.02	15.8	3.37
3.12	16.36	3.48
3.22	16.93	3.76
3.32	17.5	3.78
3.42	18.09	3.92
3.52	18.67	3.74
3.62	19.27	3.92
3.72	19.87	3.96
3.82	20.47	4.02
3.92	21.09	4.05
4.02	21.71	3.97
4.12	22.32	3.95
4.22	22.92	3.96
4.32	23.54	3.96
4.42	24.16	3.87
4.51	24.73	3.85
4.61	25.37	3.91
4.71	26.02	3.8
4.81	26.68	3.72
4.91	27.35	3.9
5.01	28.02	3.89
5.11	28.71	3.82
5.21	29.41	3.68
5.31	30.12	3.69
5.41	30.84	3.66

## Sheet: GeoB 10038-4
Depth [m]	Age [kyr BP]	d18O
0	0
0.03	0.44	2.32
0.08	0.91	2.8
0.13	1.38	1.54
0.18	1.86	1.89
0.23	2.33	2.46
0.28	2.8	2.51
0.33	3.27	2.61
0.38	3.75	2.06
0.43	4.22	2.09
0.48	4.69	2.44
0.53	5.16	2.58
0.58	5.64	1.84
0.63	6.11	2.54
0.68	6.58	2.29
0.73	7.05	2.66
0.78	7.53	2.66
0.83	8	2.43
0.88	8.47	2.71
0.93	9.08	2.72
0.98	9.7	2.54
1.03	10.31	2.7
1.08	10.93	2.19
1.13	11.54	2.8
1.18	12.16	2.77
1.23	12.77	3.1
1.28	13.39	2.89
1.33	14	3.42
1.38	14.62	3.43
1.43	15.23	3.47
1.48	15.82	3.44
1.53	16.42	3.32
1.58	17.01	3.92
1.63	17.61	3.62
1.68	18.2	3.72
1.73	18.79	3.91
1.78	19.39	4.05
1.83	19.98	3.94
1.88	20.58	4.09
1.93	21.17	3.85
1.98	21.94	3.98
2.03	22.72	3.85
2.08	23.49	3.98
2.13	24.26	3.49
2.17	24.88	4.01
2.22	25.65	3.76
2.27	26.43	4.1
2.32	27.2	4
2.37	27.87	3.72
2.42	28.54	4.01
2.47	29.21	3.79
2.52	29.88	3.45
2.57	30.54	3.57
2.62	31.21	3.68
2.67	31.88	3.78
2.72	32.55	3.46
2.77	33.43	3.89
2.82	34.31	3.69
2.87	35.19	3.63
2.92	36.07
2.97	36.95	3.66
3.02	37.83	3.53
3.07	38.71	3.54
3.12	39.59	3.41

## Sheet: GeoB3104-1
Depth [m]	Age [kyr BP]	d18O
0.03	1.39	2.23
0.055	2.13	2.32
0.08	2.88	2.29
0.105	3.62	2.32
0.13	4.37	2.22
0.155	5.11	2.07
0.18	5.86	2.49
0.23	6.89	2.32
0.255	7.26	2.54
0.28	7.62	2.23
0.305	7.99	2.33
0.33	8.36	2.6
0.355	8.72	2.28
0.38	9.09	2.49
0.405	9.45	2.45
0.43	9.82	2.52
0.48	10.55	2.47
0.505	10.92	2.5
0.555	11.5	2.51
0.58	11.76	2.68
0.605	12.02	2.55
0.63	12.28	2.6
0.655	12.53	2.97
0.68	12.79	2.9
0.755	13.57	3.08
0.78	13.83	3.09
0.805	14.09	2.49
0.83	14.35	2.84
0.88	14.81	2.55
1030	15.54	2.97
1080	15.8
1130	16.07
1180	16.33
1330	17.11
1380	17.37
1430	17.63
1480	17.89
1530	18.16
1580	18.42
1630	18.68	3.54
1655	18.81	3.63
1680	18.94	3.62
1705	19.07	3.68
1730	19.29	3.66
1755	19.63	3.66
1805	20.33	3.54
1830	20.67	3.52
1880	21.37	3.51
1905	21.71	3.3
1955	22.41	3.45
2080	24.14	3.43
2130	24.59	3.24
2155	24.78	3.51
2180	24.98	3.27
2230	25.37	3.33
2255	25.56	3.19
2330	26.15	3.19
2355	26.34	3.15
2380	26.54	3.06
2405	26.73	3.32
2430	26.93	3
2505	27.51	3.18

## Sheet: TR163-22
Depth [m]	Age [kyr BP]	d18Ou,sent
0.02	1.2	3.14
0.06	1.7	3.26
0.08	2	3.28
0.1	2.3	3.41
0.12	2.6	3.03
0.16	3.1	3.43
0.18	3.4	3.33
0.2	3.7	3.2
0.22	4	3.23
0.26	4.5	3.26
0.28	4.8	3.39
0.3	5	2.91
0.32	5.3	3.28
0.36	5.8	3.01
0.38	6.1	2.9
0.4	6.3	3.06
0.42	6.6	2.8
0.46	7.1	3.05
0.48	7.3	3.16
0.5	7.6	3.22
0.52	7.8	3.27
0.56	8.3	3.48
0.58	8.5	3.59
0.6	8.8	3.48
0.62	9	3.41
0.66	9.5	3.31
0.68	9.7	3.66
0.7	9.9	3.6
0.72	10.2	3.55
0.76	10.6	3.76
0.78	10.8	3.66
0.8	11.1	3.8
0.82	11.3	3.67
0.86	11.7	4.06
0.88	12	4.02
0.9	12.2	4.02
0.92	12.4	4.09
0.96	12.8	4.1
0.98	13	4.17
1	13.2	4.21
1.02	13.5	4.21
1.06	13.9	4.15
1.08	14.1	4.28
1.1	14.3	4.19
1.12	14.5	4.23
1.16	14.9	4.42
1.18	15.1	4.39
1.2	15.3	4.52
1.22	15.5	4.62
1.26	15.9	4.6
1.28	16.1	4.68
1.3	16.3	4.72
1.32	16.5	4.55
1.36	16.9	4.75
1.38	17.1	4.65
1.4	17.3	4.6
1.42	17.5	4.65
1.44	17.7	4.51
1.46	17.9	4.62
1.48	18.1	4.82
1.5	18.2	4.87
1.52	18.4	4.91
1.54	18.6	4.81
1.56	18.8	4.61
1.58	19	4.73
1.6	19.2	4.68
1.62	19.4	5.12
1.64	19.6	4.79
1.66	19.8	4.68
1.68	20	4.74
1.7	20.1	4.9
1.72	20.3	4.79
1.74	20.5	4.76
1.76	20.7	4.94
1.78	20.9	4.82
1.8	21.1	4.88
1.82	21.3	4.95
1.84	21.5
1.86	21.7	4.85
1.88	21.8	4.76
1.9	22	4.76
1.92	22.2	4.56
1.94	22.4	4.43
1.96	22.6	4.79
1.98	22.8	4.91
2	23	4.82
2.02	23.1	4.7
2.04	23.3	4.84
2.06	23.5	-999
2.08	23.7	4.68
2.1	23.9	4.64
2.12	24.1	4.7
2.14	24.3	4.59
2.16	24.5	4.64
2.18	24.7	4.88
2.2	24.8	4.39
2.21	24.9	4.59
2.23	25.1	-999
2.25	25.3	4.71
2.27	25.5	4.74
2.29	25.7	4.66
2.31	25.9	4.8
2.33	26.1	4.63
2.35	26.3	4.62
2.37	26.5	4.72
2.39	26.7	4.69
2.41	26.9	4.64
2.43	27.1	4.59
2.45	27.3	4.74
2.47	27.5	4.72
2.49	27.6	4.48
2.51	27.8	4.7
2.53	28	4.48
2.55	28.2	4.58
2.57	28.4	4.67
2.59	28.6	4.52
2.61	28.8	4.56
2.63	29	4.43
2.65	29.3	4.38
2.67	29.5	4.49
2.69	29.7	4.55
2.71	29.9	4.4
2.73	30.1	4.71

## Sheet: TR163-19
Depth [m]	Age [kyr BP]	d18Ouvige
0.01	1	3.19
-9.99	1.8
0.04	1.9	2.99
0.09	3.2	3.03
0.14	4.6	3.16
-9.99	6	-999
0.24	7.2	3.29
-9.99	7.4	-999
-9.99	8.8	-999
0.34	9.5	3.79
-9.99	10.2	-999
-9.99	11.6	-999
0.44	11.9	4
-9.99	13	-999
0.54	14.3	4.35
-9.99	14.5	-999
0.59	15.5	4.5
-9.99	15.9	-999
0.64	16.6	4.66
-9.99	17.3	-999
-9.99	18.7	-999
0.74	19	4.75
0.79	20.1	4.77
0.84	21.3	4.62
-9.99	21.5
0.89	22.4	4.56
-9.99	22.7	-999
0.94	23.5	4.62
-9.99	23.8	-999
0.99	24.6	4.51
-9.99	25	-999
1.04	25.8	4.6
-9.99	26.1	-999
1.09	26.9	4.57
-9.99	27.3	-999
1.14	28	4.45
-9.99	28.4	-999
1.19	29.1	4.4
-9.99	29.6	-999
1.24	30.2	4.39
-9.99	30.7	-999

## Sheet: MD06-3067
Depth [m]	Age [kyr BP]	d18O
0.11	3.39	2.61
0.2	3.61	2.77
0.3	3.86	2.65
0.4	4.14	2.91
0.5	4.44	2.8
0.6	4.81	2.51
0.7	5.39	2.65
0.8	6.09	2.6
0.9	6.85	2.64
1000	7.54	2.61
1100	8.19	2.54
1120	8.31	2.51
1140	8.43	2.85
1160	8.55	2.65
1180	8.67	2.69
1200	8.79	2.7
1220	8.9	2.71
1240	9.01
1260	9.12
1280	9.23	2.77
1300	9.34	2.86
1320	9.44	2.77
1340	9.55
1360	9.66	2.75
1380	9.77	2.9
1380	9.77	2.96
1400	9.88	2.94
1420	9.98
1440	10.09	3.02
1460	10.2	2.88
1480	10.31	2.89
1500	10.41	3.04
1520	10.53	2.96
1540	10.66
1560	10.79	2.98
1580	10.92
1600	11.05	3.04
1620	11.18	3.05
1640	11.31	3.22
1660	11.44	3
1680	11.61	3.11
1700	11.78	3.09
1720	11.96	3.09
1740	12.14	3.06
1760	12.31	3.56
1780	12.49	3.33
1800	12.67	3.43
1820	12.84	3.14
1840	13.03
1860	13.22	3.31
1880	13.41	3.36
1900	13.6	3.53
1920	13.79	3.42
1940	13.98	3.4
1960	14.16	3.27
1980	14.34	3.59
2000	14.49	3.49
2100	15.2	3.54
2200	15.76	3.71
2230	15.91
2250	16.01	3.77
2270	16.11	4.21
2290	16.21	3.98
2300	16.26	3.93
2310	16.3	3.93
2330	16.4
2350	16.5	3.84
2370	16.59	4.06
2390	16.69	4.11
2400	16.74	3.93
2410	16.79	4.09
2430	16.88	4.06
2450	16.98	4.02
2470	17.09	4.04
2490	17.2	4.05
2500	17.25	4.14
2510	17.31	4.15
2530	17.42	4.22
2550	17.52	4.18
2570	17.63	4.15
2590	17.74	4.21
2600	17.8	4.04
2610	17.86	4.11
2620	17.92
2630	17.98	4.17
2640	18.04
2650	18.11	4.17
2660	18.17
2670	18.23
2680	18.29
2690	18.35	3.86
2700	18.42	4.1
2710	18.48	3.98
2715	18.51
2720	18.54
2730	18.6	4.03
2735	18.63
2740	18.66
2750	18.73	4.14
2755	18.76
2760	18.79
2770	18.87	4.15
2780	18.94
2785	18.97
2790	19.01	4.14
2800	19.08	4.08
2810	19.15	4.12
2815	19.19
2820	19.22
2830	19.29	4.09
2835	19.33
2840	19.36
2850	19.43	3.99
2860	19.51
2870	19.58	4.09
2875	19.72	4.03
2900	19.79	4.13
2920	19.86	4.01
2940	20.03	4.02
2960	20.19	4.07
2970	20.36	4.03
2980	20.52	4.01
3000	20.6	3.98
3010	20.69	4.06
3020	20.77
3030	20.85	4.03
3040	20.93
3060	21.19	3.97
3080	21.38	4.02
3100	21.47	4.14
3100	21.47	3.9
3120	21.67
3130	21.76	3.89
3140	21.86
3150	21.95	3.94
3161	22.05	3.98
3180	22.24
3190	22.34	4.04
3200	22.43	4.1
3210	22.53	4.12
3215	22.58
3220	22.62	4.13
3240	22.85	4.05
3260	23.08	3.92
3280	23.3	4.11
3300	23.53	4
3310	23.64	4.06
3320	23.75	4.08
3340	23.98	4.09
3360	24.2	4.15
3380	24.44	4.04
3400	24.71	3.95
3420	24.98	4.03
3440	25.24	4.1
3460	25.51
3480	25.78
3500	26.05	4.07
3510	26.18	4.08
3521	26.45	3.98
3540	26.65	3.61
3560	27.04	3.93
3580	27.42
3600	27.81	4.04
3610	28.01	4
3620	28.2
3640	28.59	3.75
3660	28.98	3.83
3700	29.65	3.95
3720	29.9	3.92
3740	30.14	3.87
3760	30.39

[truncated: 98 more sheets: SCS90-36, MD04-2861, MD02-2575, AHF16832, EW9504-03, EW9504-04, EW9504-05, EW9504-08, 167-1014, EW9504-09, MD02-2503, MD01-2421, KH94-3,LM-8, KT90-9,  5 , SU92-03, NIOP 905, RC13-229,    V19-30, RC13-110, ODP1012 …]
